# Supplementary material for: Cutting-Edge Analysis of Extracellular Microparticles using ImageStreamX Imaging Flow Cytometry
Source: PubMed Central journal article supplement (PMC4050385; doi:10.1038/srep05237), 2014-06-10
Supplement: srep05237-s1.pdf [file srep05237-s1.pdf]

## Supplemental File

### Cutting-Edge Analysis of Extracellular Microparticles using ImageStream<sup>X</sup> Imaging Flow Cytometry

Sarah E Headland<sup>1</sup>, Hefin R Jones<sup>1</sup>, Adelina SV D'Sa<sup>1</sup>, Mauro Perretti<sup>1</sup>, Lucy V Norling<sup>1</sup>

<sup>1</sup>The William Harvey Research Institute, Barts and The London School of Medicine, Queen Mary University of London, Charterhouse Square, London EC1M 6BQ, United Kingdom.

**Author for correspondence:** Mauro Perretti, Centre for Biochemical Pharmacology, The William Harvey Research Institute, Barts and The London School of Medicine and Dentistry, Queen Mary University of London, Charterhouse Square, London EC1M 6BQ, United Kingdom.

Email:

[m.perretti@qmul.ac.uk](mailto:m.perretti@qmul.ac.uk);

Phone no: +44-2078828783; Fax no: +44-207-8826076

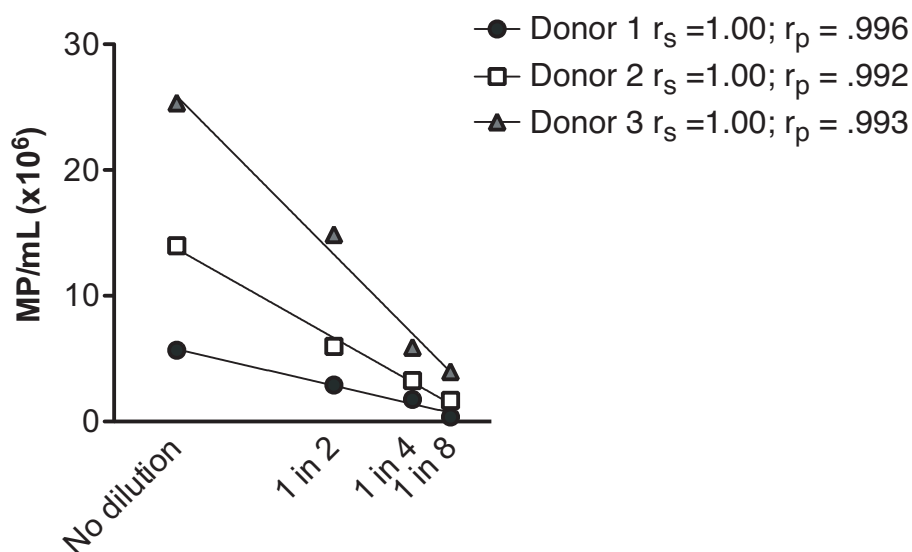

| Dilution | Microparticles/ml (x10 <sup>6</sup> ) |         |         |
|----------|---------------------------------------|---------|---------|
|          | Donor 1                               | Donor 2 | Donor 3 |
| 1        | 5.68                                  | 13.99   | 25.34   |
| 1:2      | 2.91                                  | 5.98    | 14.88   |
| 1:4      | 1.77                                  | 3.26    | 5.90    |
| 1:8      | 0.37                                  | 1.68    | 3.97    |

**Supplementary Figure S1. The correlation of microparticle number versus sample dilution using the ImageStream<sup>x</sup> is 1.** Serially diluted microparticle samples (in double-sterile 0.22 $\mu$ m-filtered PBS) from 3 separate donors were stained with BODIPY-Maleimide before acquisition using the IS<sup>x</sup>. Microparticle numbers were calculated using the objects/ml feature in IDEAS software (shown in table) and were plotted against dilution.  $r_s$  is Spearman's rho;  $r_p$  is Pearson's correlation coefficient.
